# Supplementary material
Source: Springer Nature journal article supplement (https://www.springermedizin.de/resource/supplementary/13014_2013_1224_MOESM2_ESM.pdf/9635184)

# Tumor and Normal Tissue Patient Points Nasopharynx

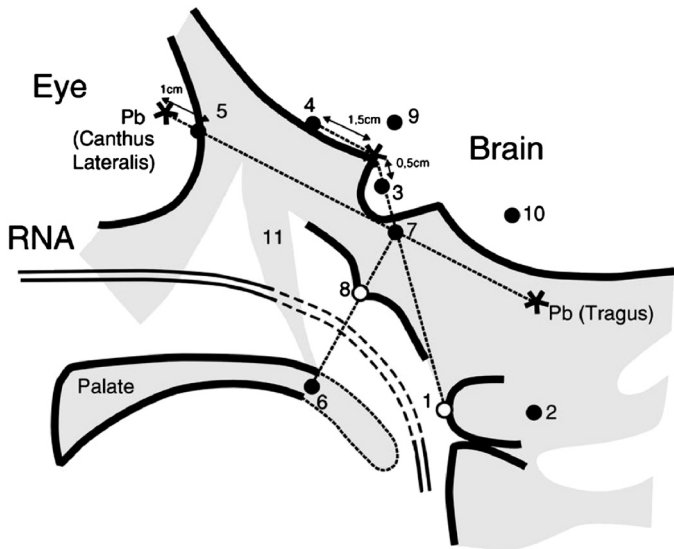

Supplement: MOESM2 [file 9635184]
